# Supplementary material for: Improving SERS hot spots for on-site pesticide detection by combining silver nanoparticles with nanowires
Source: Royal Society of Chemistry journal article supplement (doi:10.1039/c8tc01741g), 2018-01-01
Supplement: c8tc01741g1.pdf [file c8tc01741g1.pdf]

## Supporting Information

### Improving SERS Hot Spots for On-Site Pesticide Detection by Combining Silver

#### Nanoparticles with Nanowires

*Wei Wei,<sup>a</sup> Yixuan Du<sup>a</sup>, Liangmiao Zhang,<sup>a</sup> Yong Yang<sup>b</sup> and Yanfeng Gao<sup>\*a</sup>*

<sup>a</sup>School of Materials Science and Engineering, Shanghai University, Shanghai 200444, China

<sup>b</sup>Structural Ceramics Engineering Center Shanghai Institute of Ceramics, Chinese Academy of Science, Shanghai 200050, China

#### Corresponding Author

\*E-mail: yfgao@shu.edu.cn

**The preparation of AgNWs:** The synthetic method of AgNWs was based on previously published literature.<sup>1</sup> AgNWs were prepared by a polyalcohol reduction method in the presence of polyvinylpyrrolidone (PVP) as a surfactant. 0.16g of PVP (MW~1,300,00) and 0.16g of PVP (MW~58,000) were mixed and dissolved in 44 mL of EG to form a colorless and transparent solution. Then 5mL of FeCl<sub>3</sub> solution (600 μM in EG) and 6 mL of AgNO<sub>3</sub> solution (0.35 M in EG) were added rapidly to the above solution within two mins. Subsequently, the mixed solution was transferred into a flask and heated at 140 °C for 2 hours. After the reaction was finished, the precipitate was naturally cooled to room temperature. The obtained solution was centrifuged and washed with ethanol absolute and deionized water three times and redispersed in 50 mL ethanol. A final AgNWs-alcohol dispersion was obtained.

**The expression of theoretical SERS EM coupling:** In general, the local field intensity enhancement factor (LFIFE) can be described as <sup>2</sup>

$$\text{LFIEF}(r, \omega) = |E(r, \omega)|^2 / |E_0(r, \omega)|^2 \quad (1)$$

where  $E(r, \omega)$  is the local electric field amplitude,  $E_0(r, \omega)$  is the incident field amplitude. SERS benefits from both the emission and excitation enhancement, which is known as LFIEF at corresponding frequency of  $\omega_L$  and  $\omega_s$ , respectively. Therefore the SERS enhancement factors (EF) can be written as the following equation:

$$\text{EF} = \text{LFIEF}(r, \omega_L) \times \text{LFIEF}(r, \omega_s) \quad (2)$$

The equation (2) is an approximation to the real expression of EF for SERS at a given point r with all the above approximation included reads:<sup>3, 4</sup>

$$\text{EF} = \text{LFIEF}(r, \omega_L) \times \text{LFIEF}(r, \omega_s) = |E(r, \omega_L)|^2 \times |E(r, \omega_s)|^2 / |E_0(r, \omega)|^4 \quad (3)$$

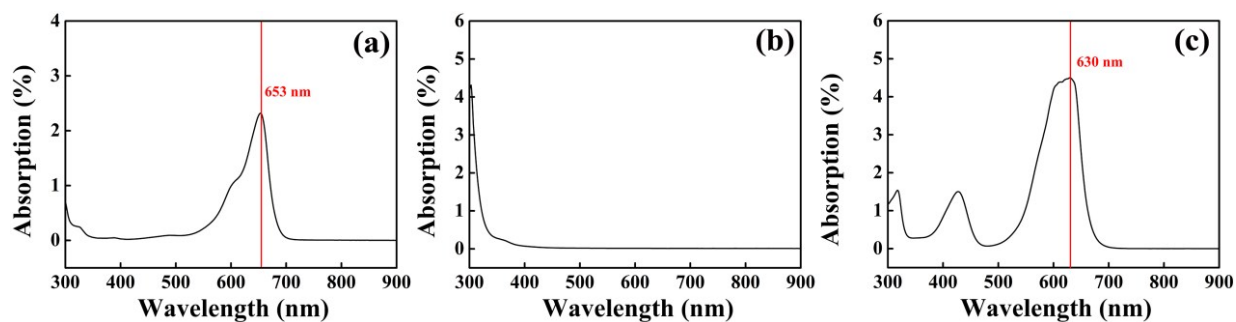

**Figure S1.** The UV-vis absorption spectra of (a) MB, (b) thiram and (c) MG aqueous solution.

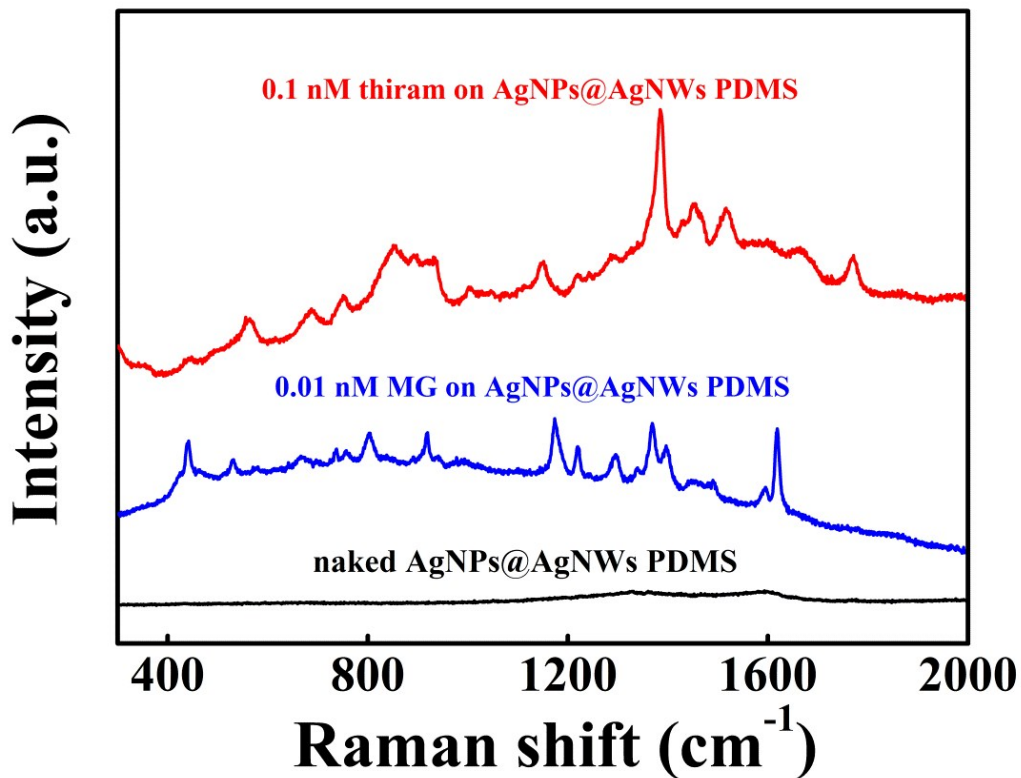

**Figure S2.** The Raman scattering spectra of 0.1 nM thiram on AgNPs@AgNWs PDMS, 0.01 nM MG on AgNPs@AgNWs PDMS and naked AgNPs@AgNWs PDMS.

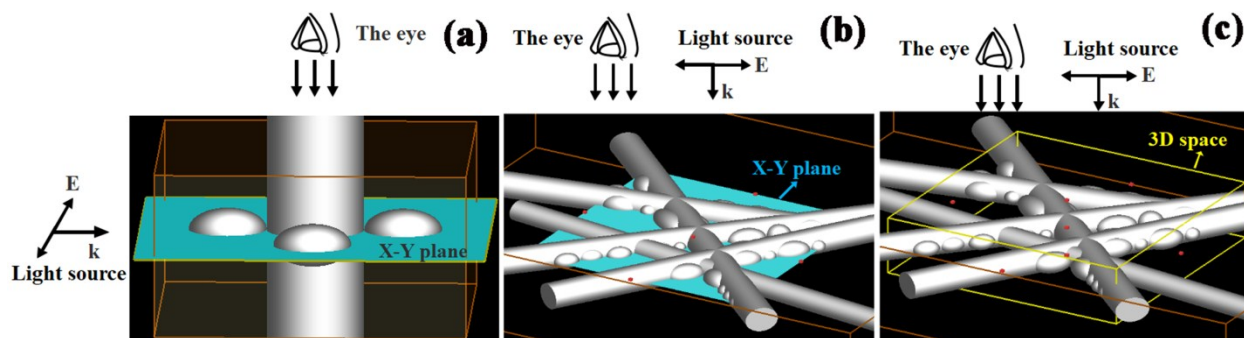

**Figure S3.** (a) The XY-view of predicted results of **Figure 2**, (b) XY-view and (c) 3D-view of practice sample of **Figure 4**.

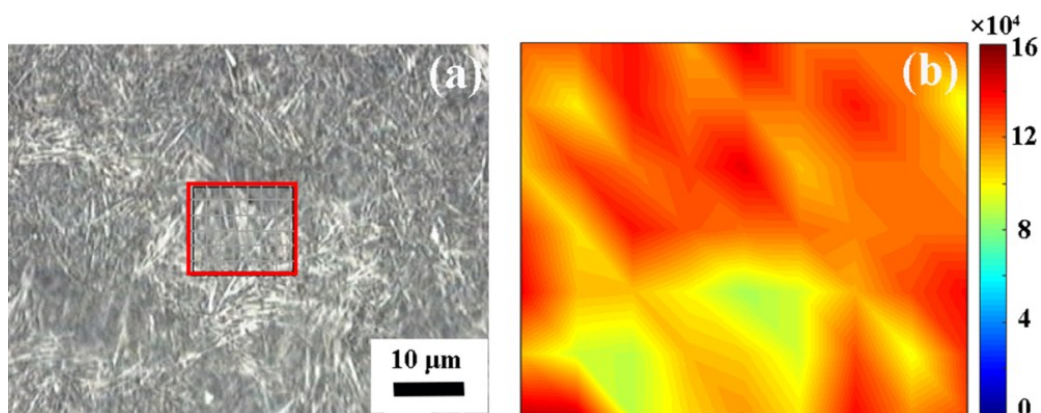

**Figure S4.** (a) The Raman mapping viewer after the  $10^{-6}$  M dried on the Au/DW-45, the Raman mapping was taken to demonstrate the uniformity across the red rectangle region (step size is  $2 \mu\text{m}$ ,  $15 \times 12 \mu\text{m}^2$ ). (b) The Raman intensity at  $1386 \text{ cm}^{-1}$  of 63 fixed sites was recorded and displayed. All active sites showed a relatively consistent Raman intensity, and no obvious particle-like structure was observed in this region. This result evidently indicates the network structure has a good uniformity and SERS reproducibility.

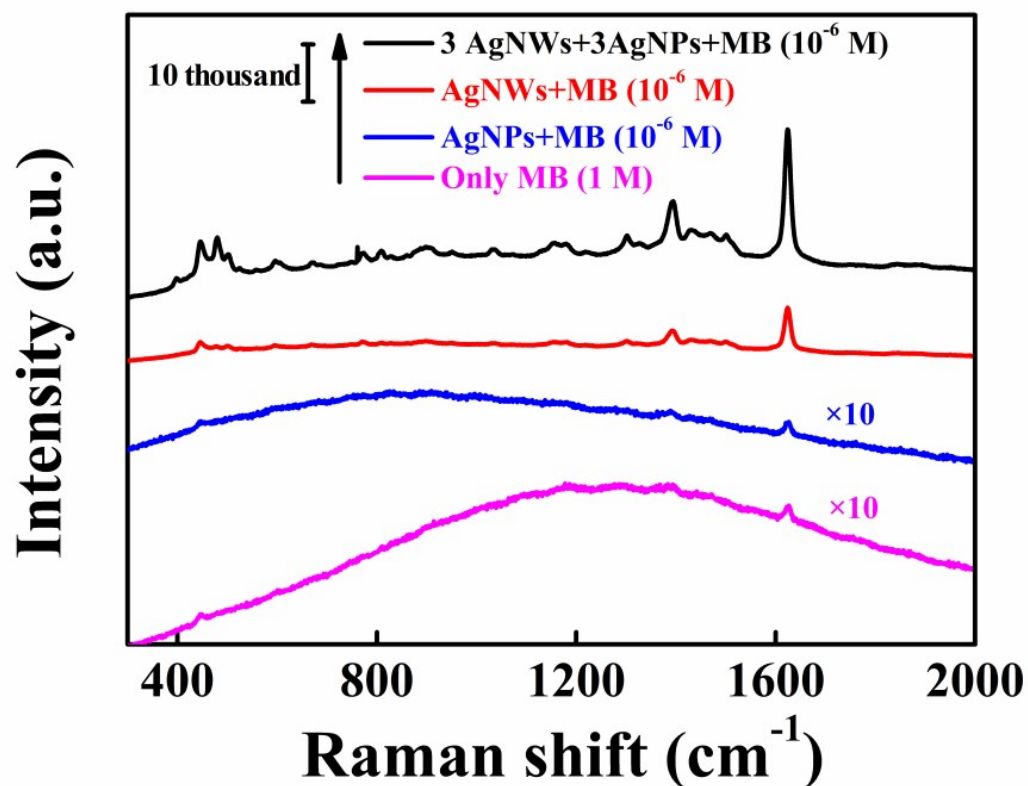

**Figure S5.** The detection of MB by SiO<sub>2</sub>/Si, AgNPs PDMS, AgNWs PDMS and AgNPs@AgNWs PDMS. The corresponding EF of AgNWs+AgNPs, AgNWs and AgNPs are  $1.49 \times 10^9$ ,  $4.78 \times 10^8$  and  $6.53 \times 10^5$ , respectively.

**Table S1.** Assignments and main Raman shifts (cm<sup>-1</sup>) for SERS spectra of thiram and MG

| vibrational description                     | thiram   |                         |
|---------------------------------------------|----------|-------------------------|
|                                             | observed | Reported <sup>5,6</sup> |
| C-N stretching, CH <sub>3</sub> deformation | 1514     | 1508                    |
| C-N Stretching, CH <sub>3</sub> deformation | 1386     | 1393                    |
| CH <sub>3</sub> N stretching                | 1145     | 1132                    |
| S-S stretching                              | 561      | 556                     |
| vibrational description                     | MG       |                         |
|                                             | observed | Reported <sup>7</sup>   |
| C-C ring stretching                         | 1618     | 1618                    |

|                           |      |      |
|---------------------------|------|------|
| N-phenyl stretching       | 1368 | 1375 |
| C-H ring in-plane bending | 1175 | 1181 |
| C-H out-of-plane bending  | 917  | 920  |
| C-H out-of-plane bending  | 806  | 811  |

### References (SI):

- (S1) Y. Ran, W. He, K. Wang, S. Ji, C. Ye, *Chem. Commun. (Camb)*, 2014, **50**, 14877.
- (S2) S. Schlücker, *Surface-Enhanced Raman Spectroscopy: Concepts and Chemical Applications*, Wiley, Weinheim, 2011.
- (S3) K. A. Willets, R. P. Van Duyne, *Annu. Rev. Phys. Chem.*, 2007, **58**, 267.
- (S4) X. Ling, L. G. Moura, M. A. Pimenta, J. Zhang, *J. Phys. Chem. C*, 2012, **116**, 25112.
- (S5) J. S. Kang, S. Y. Hwang, C. J. Lee, M. S. Lee, *Korean Chem. Soc.*, 2002, **23**, 1604.
- (S6) B. Saute, R. Narayanan, *Analyst*, 2011, **136**, 527.
- (S7) T. Yang, H. Yang, S. J. Zhen, C. Z. Huang, *ACS Appl. Mater. Interfaces*, 2015, **7**, 1586.
